# Supplementary material for: Amorphous PtNiP particle networks of different particle sizes for the electro-oxidation of hydrazine
Source: Royal Society of Chemistry journal article supplement (doi:10.1039/c5ra13774h), 2015-01-01
Supplement: c5ra13774h1.pdf [file c5ra13774h1.pdf]

## Electronic Supplementary Information (ESI)

### Amorphous PtNiP particle networks with the different particle size for hydrazine electro-oxidation

Yuanyuan Ma<sup>1</sup>, Hui Wang<sup>1</sup>, Weizhong Lv<sup>2</sup>, Shan Ji<sup>2\*\*</sup>, Bruno G. Pollet<sup>3</sup>, Shunxi Li<sup>1</sup>,

Rongfang Wang<sup>1\*</sup>

<sup>1</sup>College of Chemistry and Chemical Engineering, Northwest Normal University, Lanzhou 730070, China

<sup>2</sup>College of Chemistry and Chemical Engineering, Shenzhen University, Shenzhen 518060, China

<sup>3</sup>HySAFER, School of the Built Environment, University of Ulster, Shore Road, Newtownabbey, Co. Antrim, BT37 0QB, UK

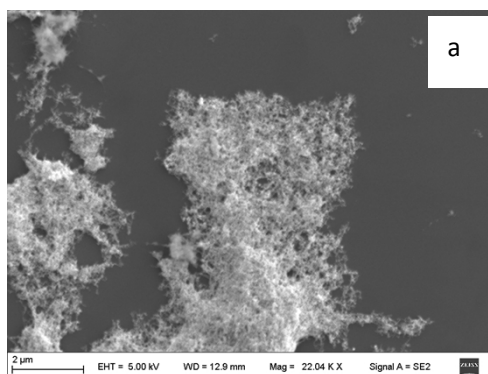

---

R.F. Wang (\*): [wrf38745779@126.com](mailto:wrf38745779@126.com), Tel./Fax: +86-931-7971533

S. Ji (\*\*): [sji@uwc.ac.za](mailto:sji@uwc.ac.za), Tel./Fax: +27-21-9599316

b

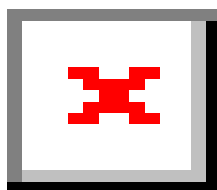

**Figure S1.** SEM images of Pt (a) and PtNi (b).

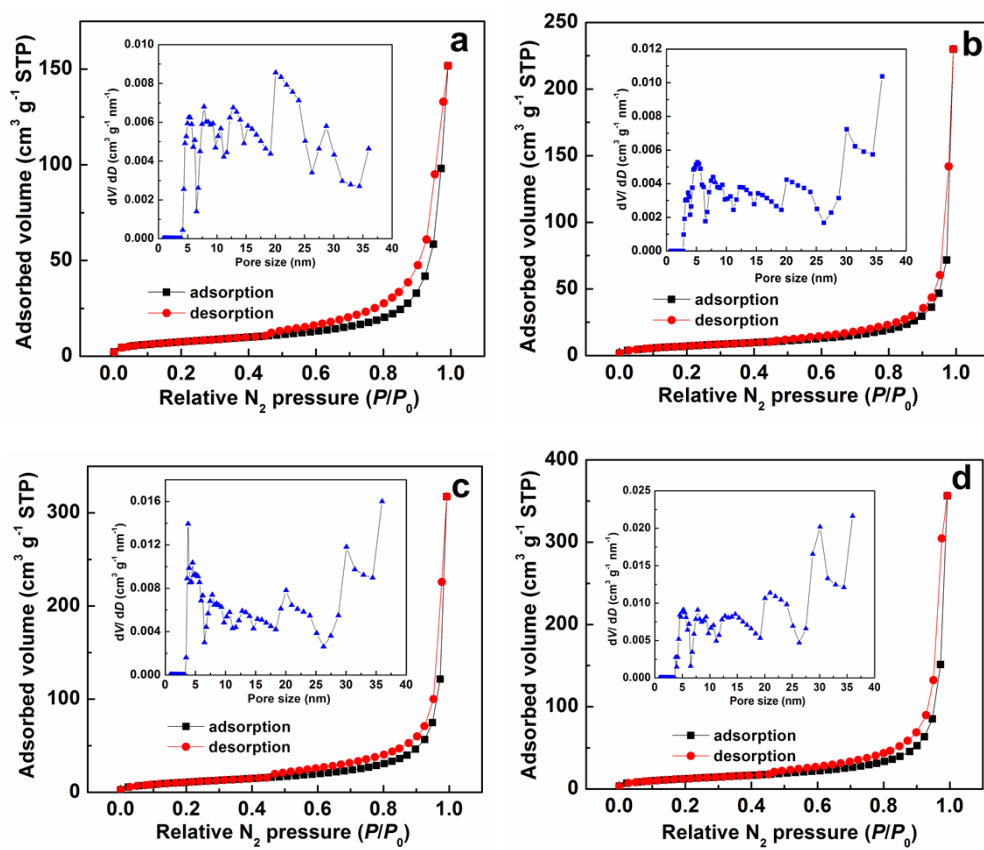

**Figure S2.**  $N_2$  adsorption-desorption isotherms of (a)PtNiP-0, (b) PtNiP-20, (c) PtNiP-50, and (d) PtNiP-80 samples; the inset: the pore size distribution.
